# Supplementary material
Source: PubMed Central journal article supplement (PMC6711308)

## KEBA NA EBOLA !

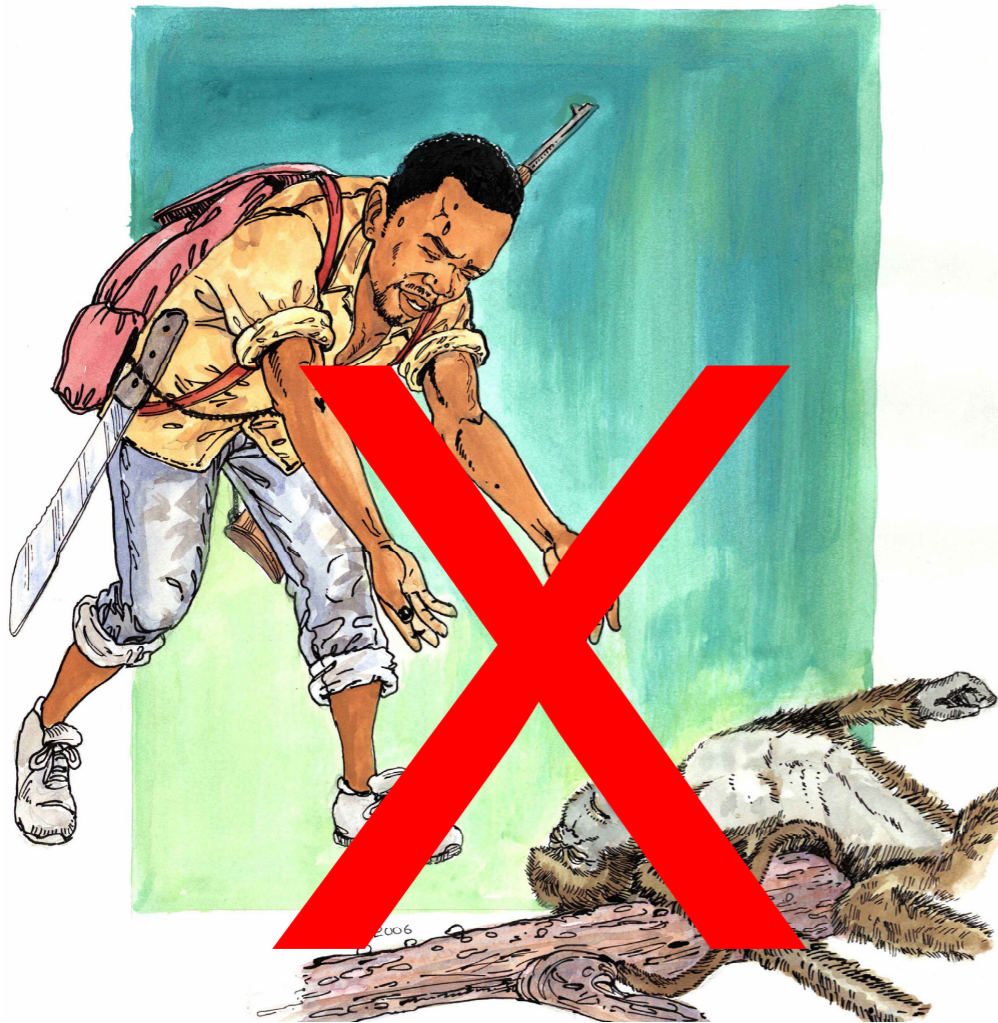

- Bokono ya ebola ezali ki ndoki te.
- Ezali Bokono oyo ebomaka ba niama ya zamba pe bato.
- Bokono yango ezali ko zuama na tango oyo ozali kosimba niama oyo akufi na ebola.
- Epekisami na yo ko simba niama oyo basili ko kufa na zamba.
- Soki bo kuti niama moko to ebele ba kufi na zamba esengueli bo yebisa noki na ba nkambi ya mboka.

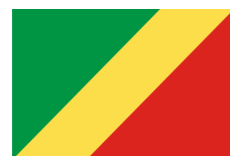

MINISTERE DE LA SANTE,  
DES AFFAIRES SOCIALES  
ET DE LA FAMILLE

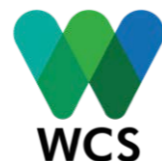

## ATTENTION EBOLA!

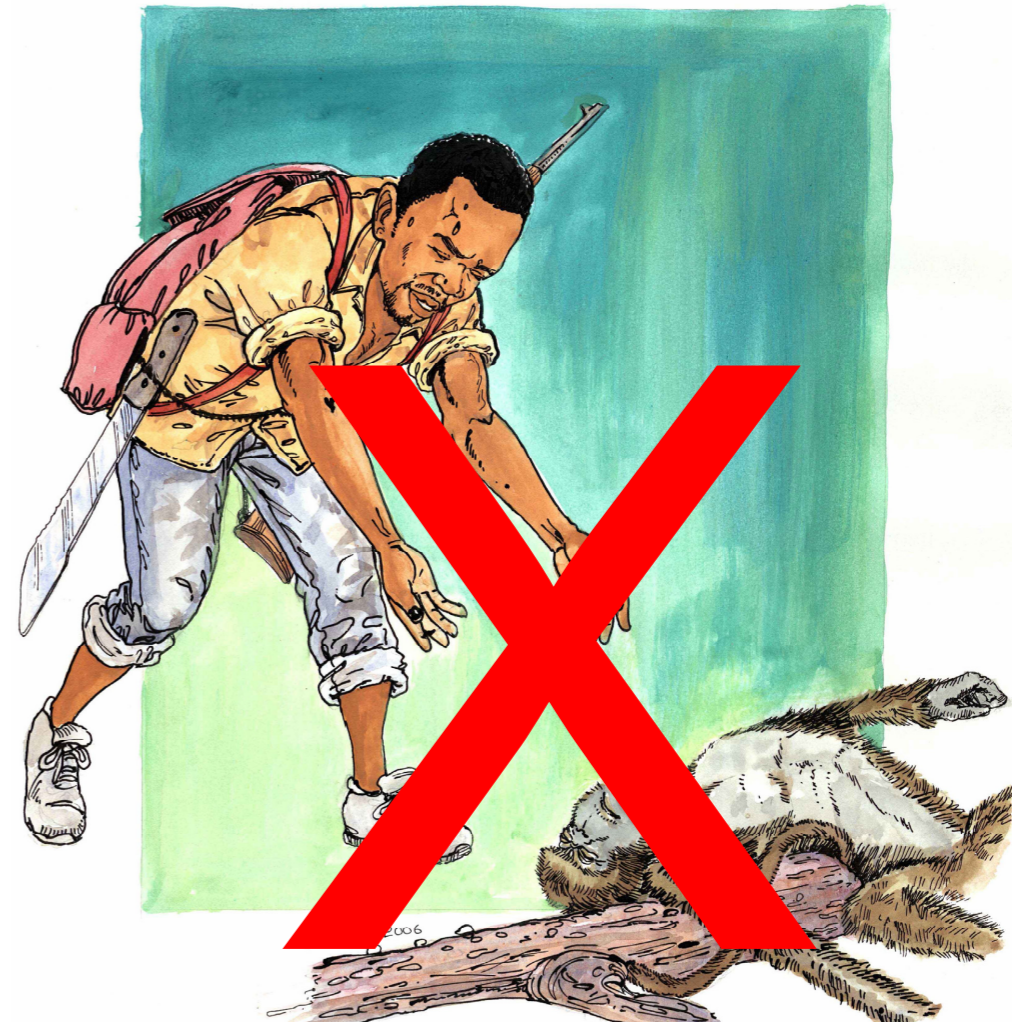

- On n'attrape pas la Fièvre Ebola par sorcellerie.
- La Fièvre Ebola est une maladie mortelle !
- La Fièvre Ebola tue les humains et certains animaux.
- On attrape le virus après contact avec un animal malade de Fièvre Ebola.
- Ne touchez pas les animaux trouvés morts en forêt, on ne sait jamais.
- Si vous trouvez un ou plusieurs animaux morts en forêt, contactez toute de suite les autorités locales.

Le numero pour rapporter une carcasse c'est le **050 307 251**

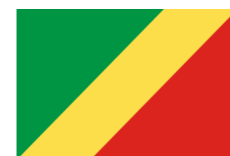

MINISTERE DE LA SANTE,  
DES AFFAIRES SOCIALES  
ET DE LA FAMILLE

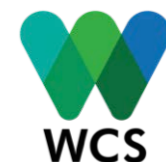

Supplement: rstb20180339supp1.pdf [file rstb20180339supp1.pdf]
