# Supplementary material
Source: PubMed Central journal article supplement (PMC6711308)
Supplement: rstb20180339supp4.pdf [file rstb20180339supp4.pdf]

**Appendix S4.**

**Carcasses sampled and tested between November 2006 and August 2018**

Abbreviations: FMU is Forestry Management Unit, NNNP is Nouabalé-Ndoki National Park and OKNP is Odzala-Kokoua National Park.

| Date     | Species    | Location                    | Reporting person | EBOV RT-qPCR Result |
|----------|------------|-----------------------------|------------------|---------------------|
| Nov 2006 | Chimpanzee | Liouesso, Ngombé FMU        | Park ranger      | Negative            |
| Jan 2007 | Gorilla    | Libonga, Ngombé FMU         | Village member   | Negative            |
| Jan 2007 | Gorilla    | Libonga, Ngombé FMU         | Village member   | Negative            |
| Jan 2007 | Gorilla    | Libonga, Ngombé FMU         | Village member   | Negative            |
| Jan 2007 | Gorilla    | Libonga, Ngombé FMU         | Village member   | Negative            |
| Jan 2007 | Gorilla    | Louame                      | Village member   | Negative            |
| Jan 2007 | Gorilla    | Libonga, Ngombé FMU         | Village member   | Negative            |
| Feb 2007 | Gorilla    | Mokoko                      | Research team    | Negative            |
| Feb 2007 | Gorilla    | River Miteba                | Research team    | Negative            |
| Jun 2007 | Gorilla    | Loundoungou                 | Research team    | Negative            |
| Jul 2007 | Gorilla    | Goualougo                   | Research team    | Negative            |
| Jul 2007 | Gorilla    | Lefini Lesio Louna          | Park ranger      | Negative            |
| Apr 2008 | Chimpanzee | Mokouagonda-Mobangui        | Village member   | Negative            |
| Nov 2008 | Gorilla    | Lefini Reserve              | Park ranger      | Negative            |
| Nov 2008 | Gorilla    | Lefini Reserve              | Park ranger      | Negative            |
| Dec 2008 | Gorilla    | Mopo Bai, NNNP              | Village member   | Negative            |
| Jan 2009 | Gorilla    | Mondika, NNNP               | Park ranger      | Negative            |
| May 2009 | Gorilla    | Ngombé FMU                  | Research team    | Negative            |
| Aug 2009 | Gorilla    | Lingoue River, Ngombé FMU   | Village member   | Negative            |
| Oct 2009 | Gorilla    | Mbeli, NNNP                 | Tracker          | Negative            |
| Oct 2009 | Gorilla    | Mikomé, Ngombé FMU          | Village member   | Negative            |
| Nov 2009 | Gorilla    | Mondika, NNNP               | Tracker          | Negative            |
| Dec 2009 | Chimpanzee | Mondika, NNNP               | Tracker          | Negative            |
| Dec 2009 | Gorilla    | Mondika, NNNP               | Tracker          | Negative            |
| Mar 2010 | Chimpanzee | Molanda, Ngombé FMU         | Village member   | Negative            |
| Mar 2010 | Gorilla    | Goualougo Triangle, NNNP    | Tracker          | Negative            |
| Mar 2010 | Gorilla    | Djéké, NNNP                 | Tracker          | Negative            |
| Mar 2010 | Gorilla    | Mondika, NNNP               | Tracker          | Negative            |
| Nov 2010 | Gorilla    | Konda, Ngombé FMU           | Village member   | Negative            |
| Nov 2010 | Chimpanzee | DVD, Ngombé FMU             | Village member   | Negative            |
| Oct 2011 | Gorilla    | Mbeli, NNNP                 | Tracker          | Negative            |
| Apr 2012 | Gorilla    | Mondika, NNNP               | Tracker          | Negative            |
| Aug 2012 | Gorilla    | Ndjokoumatombe              | Village member   | Negative            |
| Sep 2012 | Chimpanzee | Djebe, Ebana                | Park ranger      | Negative            |
| Mar 2013 | Hippo      | Lokoue                      | Tracker          | Negative            |
| Jun 2014 | Gorilla    | Bomassa, Sangha             | Park ranger      | Negative            |
| Jun 2014 | Gorilla    | Mondika, NNNP               | Tracker          | Negative            |
| Oct 2014 | Gorilla    | Mondika, NNNP               | Park ranger      | Negative            |
| Oct 2014 | Elephant   | Mondika, NNNP               | Park ranger      | Negative            |
| Oct 2014 | Duiker     | Mbeli, NNNP                 | Tracker          | Negative            |
| Oct 2014 | Mongoose   | Nganda Messosso, Ngombé FMU | Village member   | Negative            |
| Nov 2014 | Chimpanzee | Goualougo Triangle, NNNP    | Tracker          | Negative            |
| Apr 2015 | Gorilla    | Louvanzi                    | Research team    | Negative            |
| Feb 2016 | Gorilla    | Paris, Ngombé FMU           | Village member   | Negative            |
| Jun 2016 | Gorilla    | Mombongo, Sangha            | Research team    | Negative            |
| Aug 2016 | Gorilla    | Mondika, NNNP               | Research team    | Negative            |
| Sep 2016 | Gorilla    | Paris, Ngombé FMU           | Village member   | Negative            |
| Feb 2017 | Chimpanzee | Nyenguté, Sangha TNS        | Park ranger      | Negative            |
| Mar 2017 | Chimpanzee | DVD, Ngombé FMU             | Village member   | Negative            |
| Apr 2017 | Gorilla    | Mondika, NNNP               | Research team    | Negative            |
| May 2017 | Gorilla    | Bomassa, Sangha             | Village member   | Negative            |
| May 2017 | Elephant   | Mopo, NNNP                  | Park ranger      | Negative            |
| Jul 2017 | Gorilla    | Djebe, OKNP                 | Park ranger      | Negative            |
| Sep 2017 | Gorilla    | Mondika, NNNP               | Research team    | Negative            |
| Dec 2017 | Duiker     | Ngombé FMU                  | Village member   | Negative            |
| Mar 2018 | Gorilla    | Goualougo, NNNP             | Tracker          | Negative            |
| Mar 2018 | Chimpanzee | Goualougo, NNNP             | Tracker          | Negative            |
| Aug 2018 | Elephant   | Bomassa, Sangha             | Village member   | Negative            |

Kuisma E et al. 2019  
Long-term Wildlife Mortality Surveillance in Northern Congo: a Model for the Detection of Ebola  
Virus Disease Epizootics  
Phil. Trans. R. Soc. B
